# Supplementary material for: Identifying magic-number structures of supported sub-nano Ni clusters and the influence of hydrogen coverage: a density functional theory based particle swarm optimization investigation
Source: Royal Society of Chemistry journal article supplement (doi:10.1039/d3cy00037k), 2023-01-01
Supplement: d3cy00037k1.pdf [file d3cy00037k1.pdf]

## Supporting Information

### Identifying Magic-number Structures of Supported Sub-Nano Ni Cluster and the Influence of Hydrogen Coverage: A Density Functional Theory Based Particle Swarm Optimization Investigation

Qitang Ma<sup>a,†</sup>, Houyu Zhu<sup>a,\*†</sup>, Dongyuan Liu<sup>a</sup>, Rui Li<sup>a</sup>, Tuya Li<sup>a</sup>, Hao Ren<sup>a</sup>, Wen Zhao<sup>a</sup>, Yuan Pan<sup>b</sup>, Yunqi Liu<sup>b</sup>, Wenyue Guo<sup>a,\*</sup>

<sup>a</sup> School of Materials Science and Engineering, China University of Petroleum (East China), Qingdao, Shandong 266580, China

<sup>b</sup> State Key Laboratory of Heavy Oil Processing, College of Chemical Engineering, China University of Petroleum (East China), Qingdao, Shandong 266580, China

\*Corresponding authors: Houyu Zhu, Wenyue Guo

E-mail address: [hyzhu@upc.edu.cn](mailto:hyzhu@upc.edu.cn), [wgyuo@upc.edu.cn](mailto:wgyuo@upc.edu.cn)

† These authors have made an equal contribution to this work.

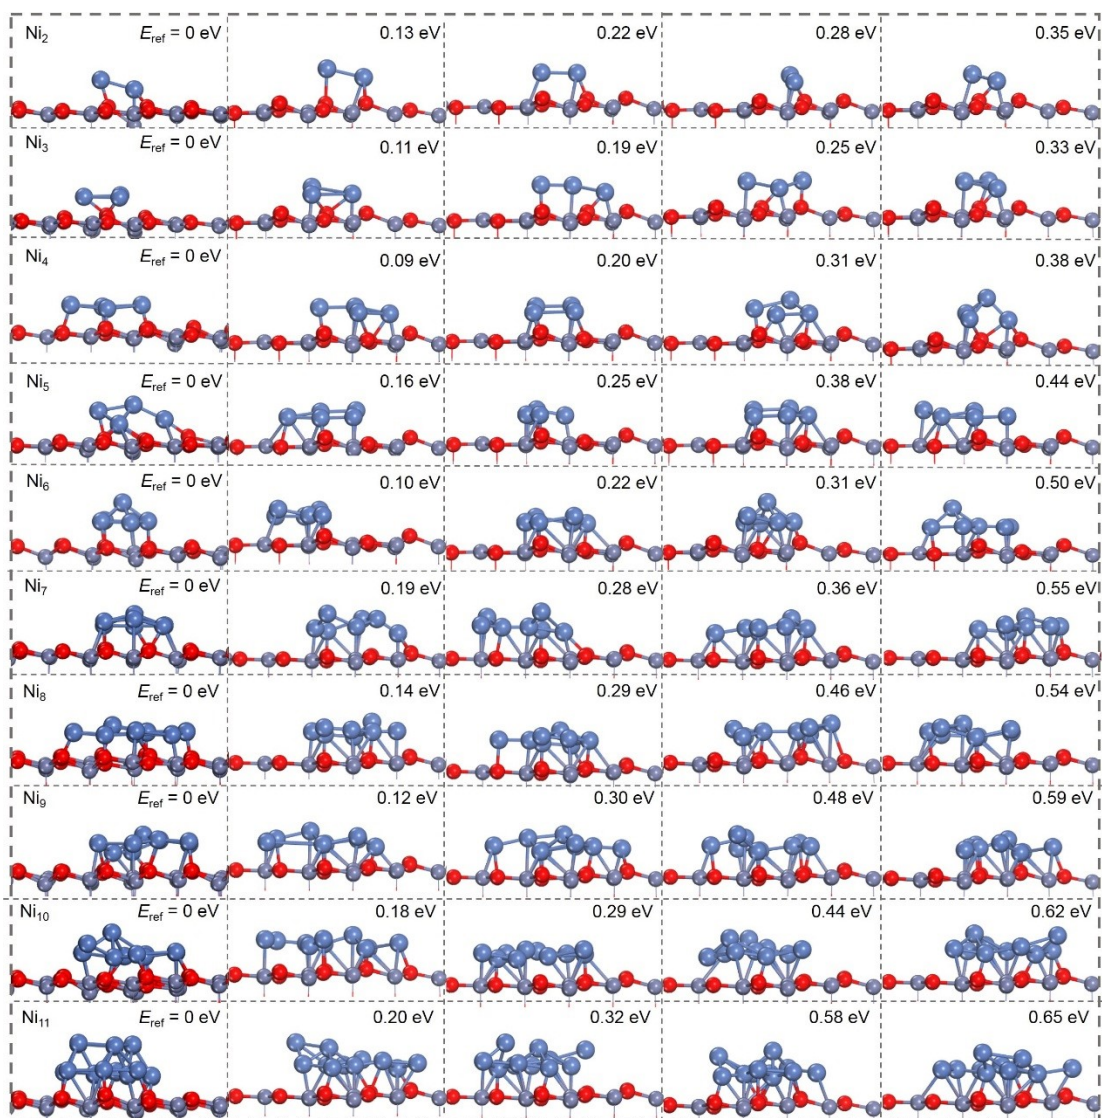

**Figure S1.** Five lowest-energy structures of the Ni<sub>n</sub> (n = 2–11) cluster on ZnO(000 $\bar{1}$ ).

The most stable ones are chosen to represent the global minimum geometries for each cluster, and the corresponding total energies are taken as the energy reference ( $E_{\text{ref}}$ , eV).

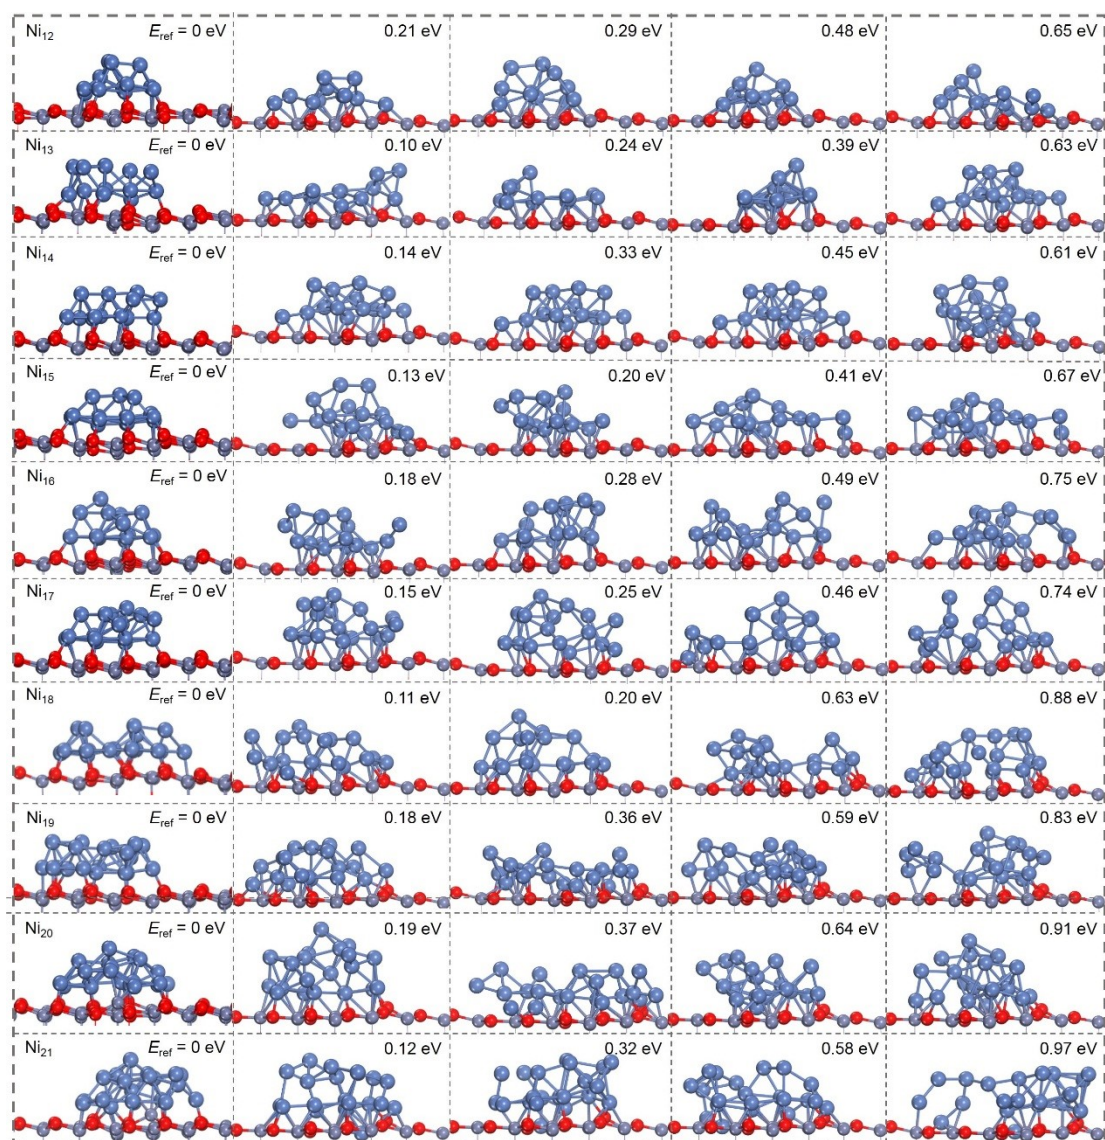

**Figure S2.** Five lowest-energy structures of the  $\text{Ni}_n$  ( $n = 12\text{--}21$ ) cluster on  $\text{ZnO}(000\bar{1})$ .

The most stable ones are chosen to represent the global minimum geometries for each cluster, and the corresponding total energies are taken as the energy reference ( $E_{\text{ref}}$ , eV).

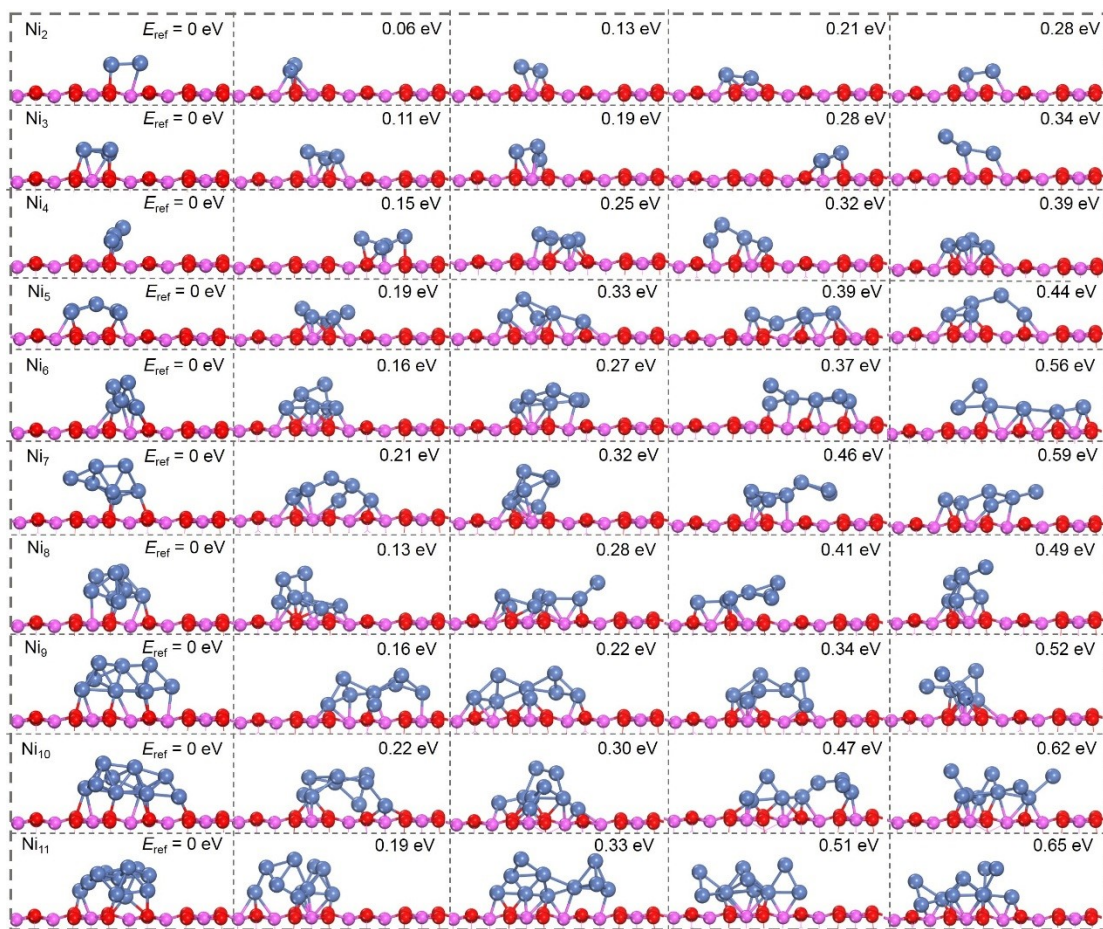

**Figure S3.** Five lowest-energy structures of the Ni<sub>n</sub> (n = 2–11) cluster on  $\gamma$ -Al<sub>2</sub>O<sub>3</sub>(100).

The most stable ones are chosen to represent the global minimum geometries for each cluster, and the corresponding total energies are taken as the energy reference ( $E_{\text{ref}}$ , eV).

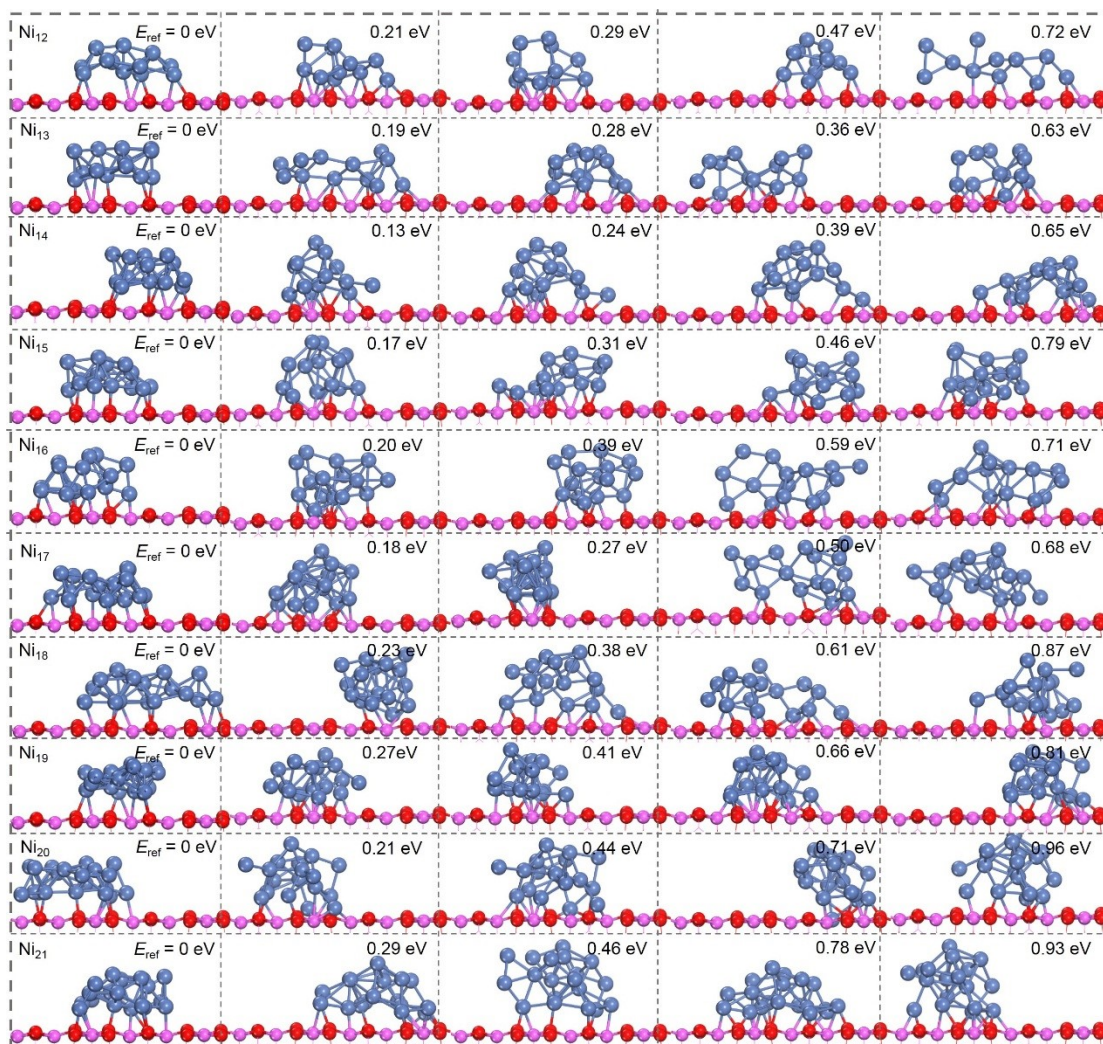

**Figure S4.** Five lowest-energy structures of the Ni<sub>n</sub> ( $n = 12\text{--}21$ ) cluster on  $\gamma\text{-Al}_2\text{O}_3(100)$ . The most stable ones are chosen to represent the global minimum geometries for each cluster, and the corresponding total energies are taken as the energy reference ( $E_{\text{ref}}$ , eV).

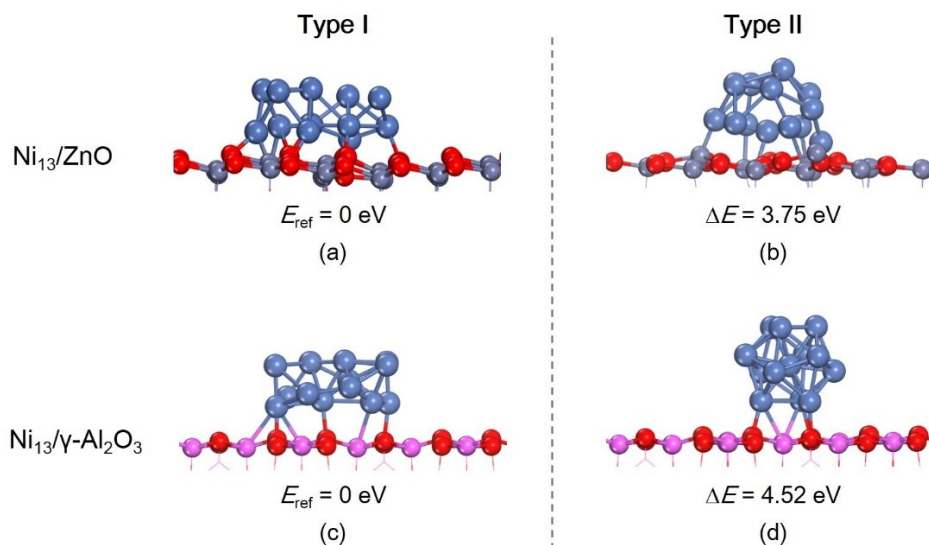

**Figure S5.** Two types of Ni<sub>13</sub>/ZnO and Ni<sub>13</sub>/γ-Al<sub>2</sub>O<sub>3</sub> models. Type I: Ni<sub>13</sub>/ZnO (a) and Ni<sub>13</sub>/γ-Al<sub>2</sub>O<sub>3</sub> (c) models are searched and optimized by the DFT based PSO methods. Type II: Ni<sub>13</sub>/ZnO (b) and Ni<sub>13</sub>/γ-Al<sub>2</sub>O<sub>3</sub> (d) models are constructed by direct deposition of the most stable gas-phase magic Ni<sub>13</sub> cluster on ZnO(000 $\bar{1}$ ) and γ-Al<sub>2</sub>O<sub>3</sub>(100), respectively. The total energies of Type I models are taken as the energy reference ( $E_{\text{ref}}$ , eV).

**Table S1. Average uncoordinated bonds (AUB) of gas-phase Ni clusters.**

|                  | AUB   |                  | AUB  |
|------------------|-------|------------------|------|
| Ni <sub>2</sub>  | 11.00 | Ni <sub>12</sub> | 6.00 |
| Ni <sub>3</sub>  | 10.00 | Ni <sub>13</sub> | 5.64 |
| Ni <sub>4</sub>  | 9.00  | Ni <sub>14</sub> | 5.60 |
| Ni <sub>5</sub>  | 8.00  | Ni <sub>15</sub> | 5.57 |
| Ni <sub>6</sub>  | 8.00  | Ni <sub>16</sub> | 5.56 |
| Ni <sub>7</sub>  | 7.50  | Ni <sub>17</sub> | 5.56 |
| Ni <sub>8</sub>  | 7.42  | Ni <sub>18</sub> | 5.50 |
| Ni <sub>9</sub>  | 6.89  | Ni <sub>19</sub> | 5.36 |
| Ni <sub>10</sub> | 6.7   | Ni <sub>20</sub> | 5.04 |
| Ni <sub>11</sub> | 6.36  | Ni <sub>21</sub> | 5.00 |

**Table S2. Comparison between the D3 corrected and uncorrected energies (eV) for the Ni<sub>11</sub>H<sub>x</sub> (x = 2, 4, 6, 8, 10, 12) clusters on ZnO and  $\gamma$ -Al<sub>2</sub>O<sub>3</sub> surfaces.**

|                                  | ZnO         |           | Al <sub>2</sub> O <sub>3</sub> |           |
|----------------------------------|-------------|-----------|--------------------------------|-----------|
|                                  | uncorrected | corrected | uncorrected                    | corrected |
| Ni <sub>11</sub> H <sub>2</sub>  | -477.48     | -480.23   | -881.12                        | -885.11   |
| Ni <sub>11</sub> H <sub>4</sub>  | -481.55     | -484.36   | -887.96                        | -891.94   |
| Ni <sub>11</sub> H <sub>6</sub>  | -490.84     | -493.67   | -896.45                        | -900.52   |
| Ni <sub>11</sub> H <sub>8</sub>  | -499.87     | -502.79   | -902.48                        | -906.61   |
| Ni <sub>11</sub> H <sub>10</sub> | -508.11     | -511.12   | -909.53                        | -913.75   |
| Ni <sub>11</sub> H <sub>12</sub> | -516.63     | -519.71   | -916.74                        | -920.91   |
